# Supplementary material for: Microgel-encapsulated tetrandrine nanoparticles promote spinal cord repair by sustaining neuroinflammation inhibition
Source: Royal Society of Chemistry journal article supplement (doi:10.1039/d4tb02080d), 2024-11-21
Supplement: d4tb02080d4.pdf [file d4tb02080d4.pdf]

**Supplemental Table 1 Primer sequences for the RT-qPCR analysis.**

| <b>Gene</b> | <b>Primer sequences</b>                                                |
|-------------|------------------------------------------------------------------------|
| GAPDH       | F: 5'-CAAGTTCAACGGCACAGTCAAGG-3'<br>R: 5'-ACATACTCAGCACCAGCATCACC-3'   |
| Serping 1   | F: 5'-CGGCTACGAAGAAGGCTGAGAC-3'<br>R: 5'-CCCAAGAAGGACCTGCGTGAG-3'      |
| H2-T23      | F: 5'-GCCTTCTCCATTCACCGACTCC-3'<br>R: 5'-CTCTTCCTCCTCCTCACAACAGC-3'    |
| C1r         | F: 5'-CTACCAGGCTGTGGACCTTGATG-3'<br>R: 5'-AGGACGGCAGGAACAGAAGTAAC-3'   |
| C3          | F: 5'-CTTGTGAGCCTGGAGTGGACTAC-3'<br>R: 5'-ATCTGAGCCTGACTTGATGACCTG-3'  |
| LCN2        | F: 5'-AGCTACAACGTCACTTCCATCCTC-3'<br>R: 5'-TCGGCCACTTGCACATCGTAG-3'    |
| iNOS        | F: 5'-GACGAGACGGATAGGCAGAGATTG-3'<br>R: 5'-AACTCTTCAAGCACCTCCAGGAAC-3' |
| IL-6        | F: 5'-TTCTTGGGACTGATGCTGGTGAC-3'<br>R: 5'-GTGGTATCCTCTGTGAAGTCTCCTC-3' |
| IFN-r       | F: 5'-TGGAGGAACTGGCAAAGGATGG-3'<br>R: 5'-ATGACGCTTATGTTGTTGCTGATGG-3'  |
| TNF-a       | F: 5'-ACGCTCTTCTGTCTACTGAACTTCG-3'<br>R: 5'-TGGTTTGTGAGTGTGAGGGTCTG-3' |
| IL-1a       | F: 5'-AGGTTCTGAAGAAGAGACGGTTGAG-3'<br>R: 5'-TTCCTCTGAGTCATTGGCGATGG-3' |
| C1q         | F: 5'-CTGAAGGGCGTGAAAGGCAATC-3'<br>R: 5'-CGTGTGGTTCTGGTATGGACTCTC-3'   |
