# Supplementary figures and images for: Microgel-encapsulated tetrandrine nanoparticles promote spinal cord repair by sustaining neuroinflammation inhibition
Source: Royal Society of Chemistry journal article supplement (doi:10.1039/d4tb02080d), 2024-11-21

Zeta Potential Distribution

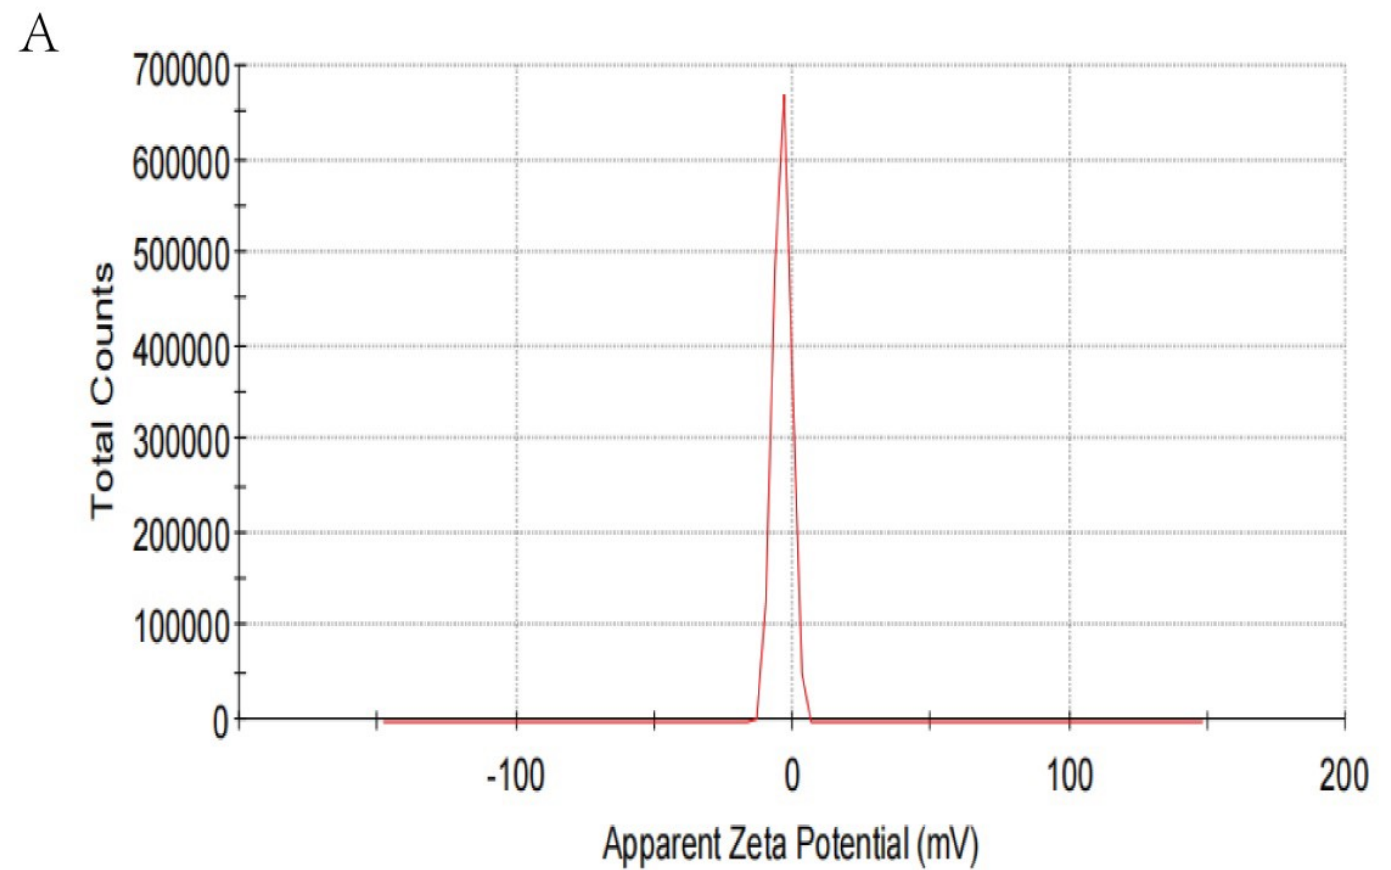

Size Distribution by Intensity

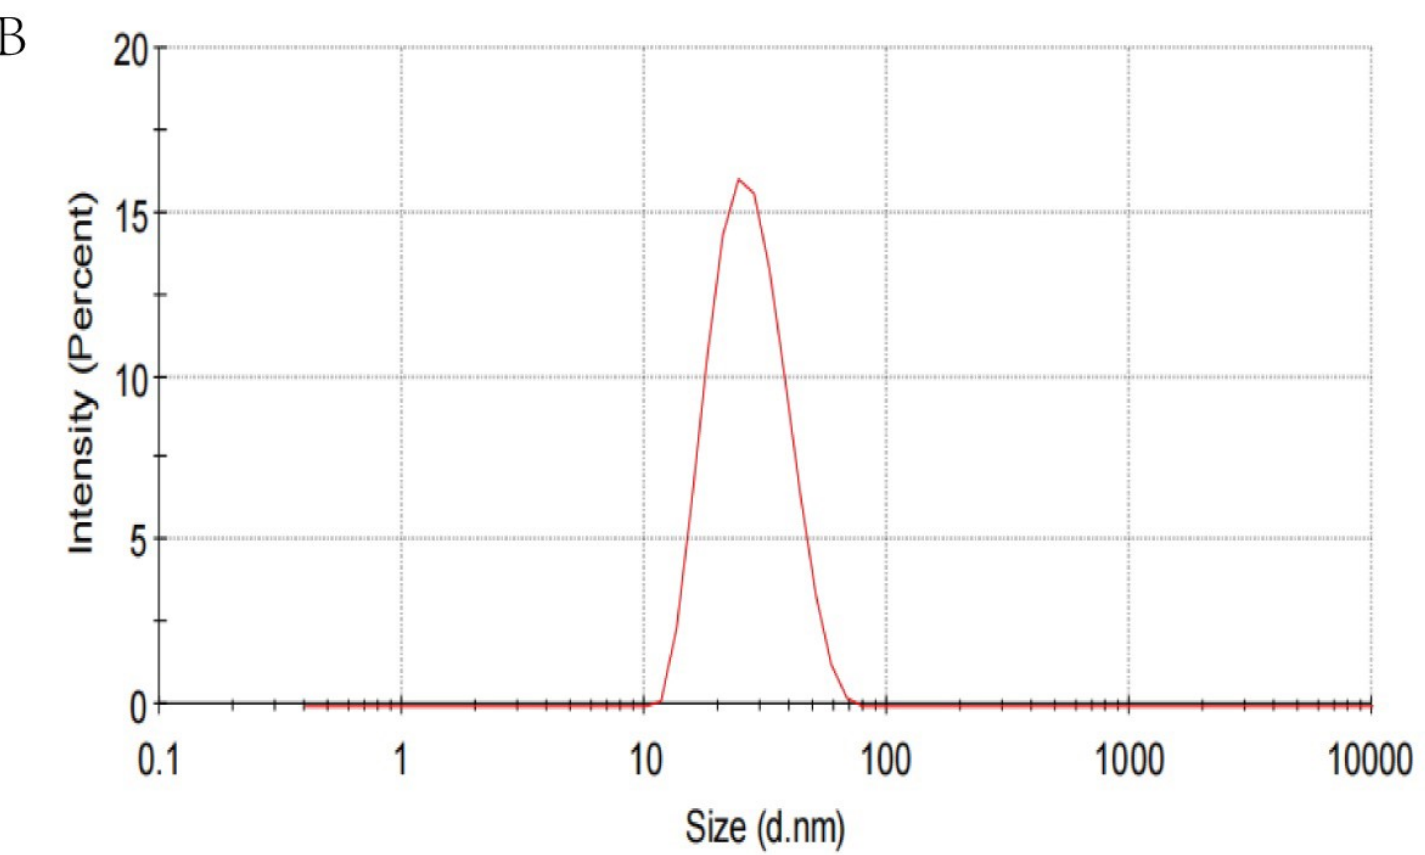

Supplement: d4tb02080d1.pdf [file d4tb02080d1.pdf]

CD68/DAPI

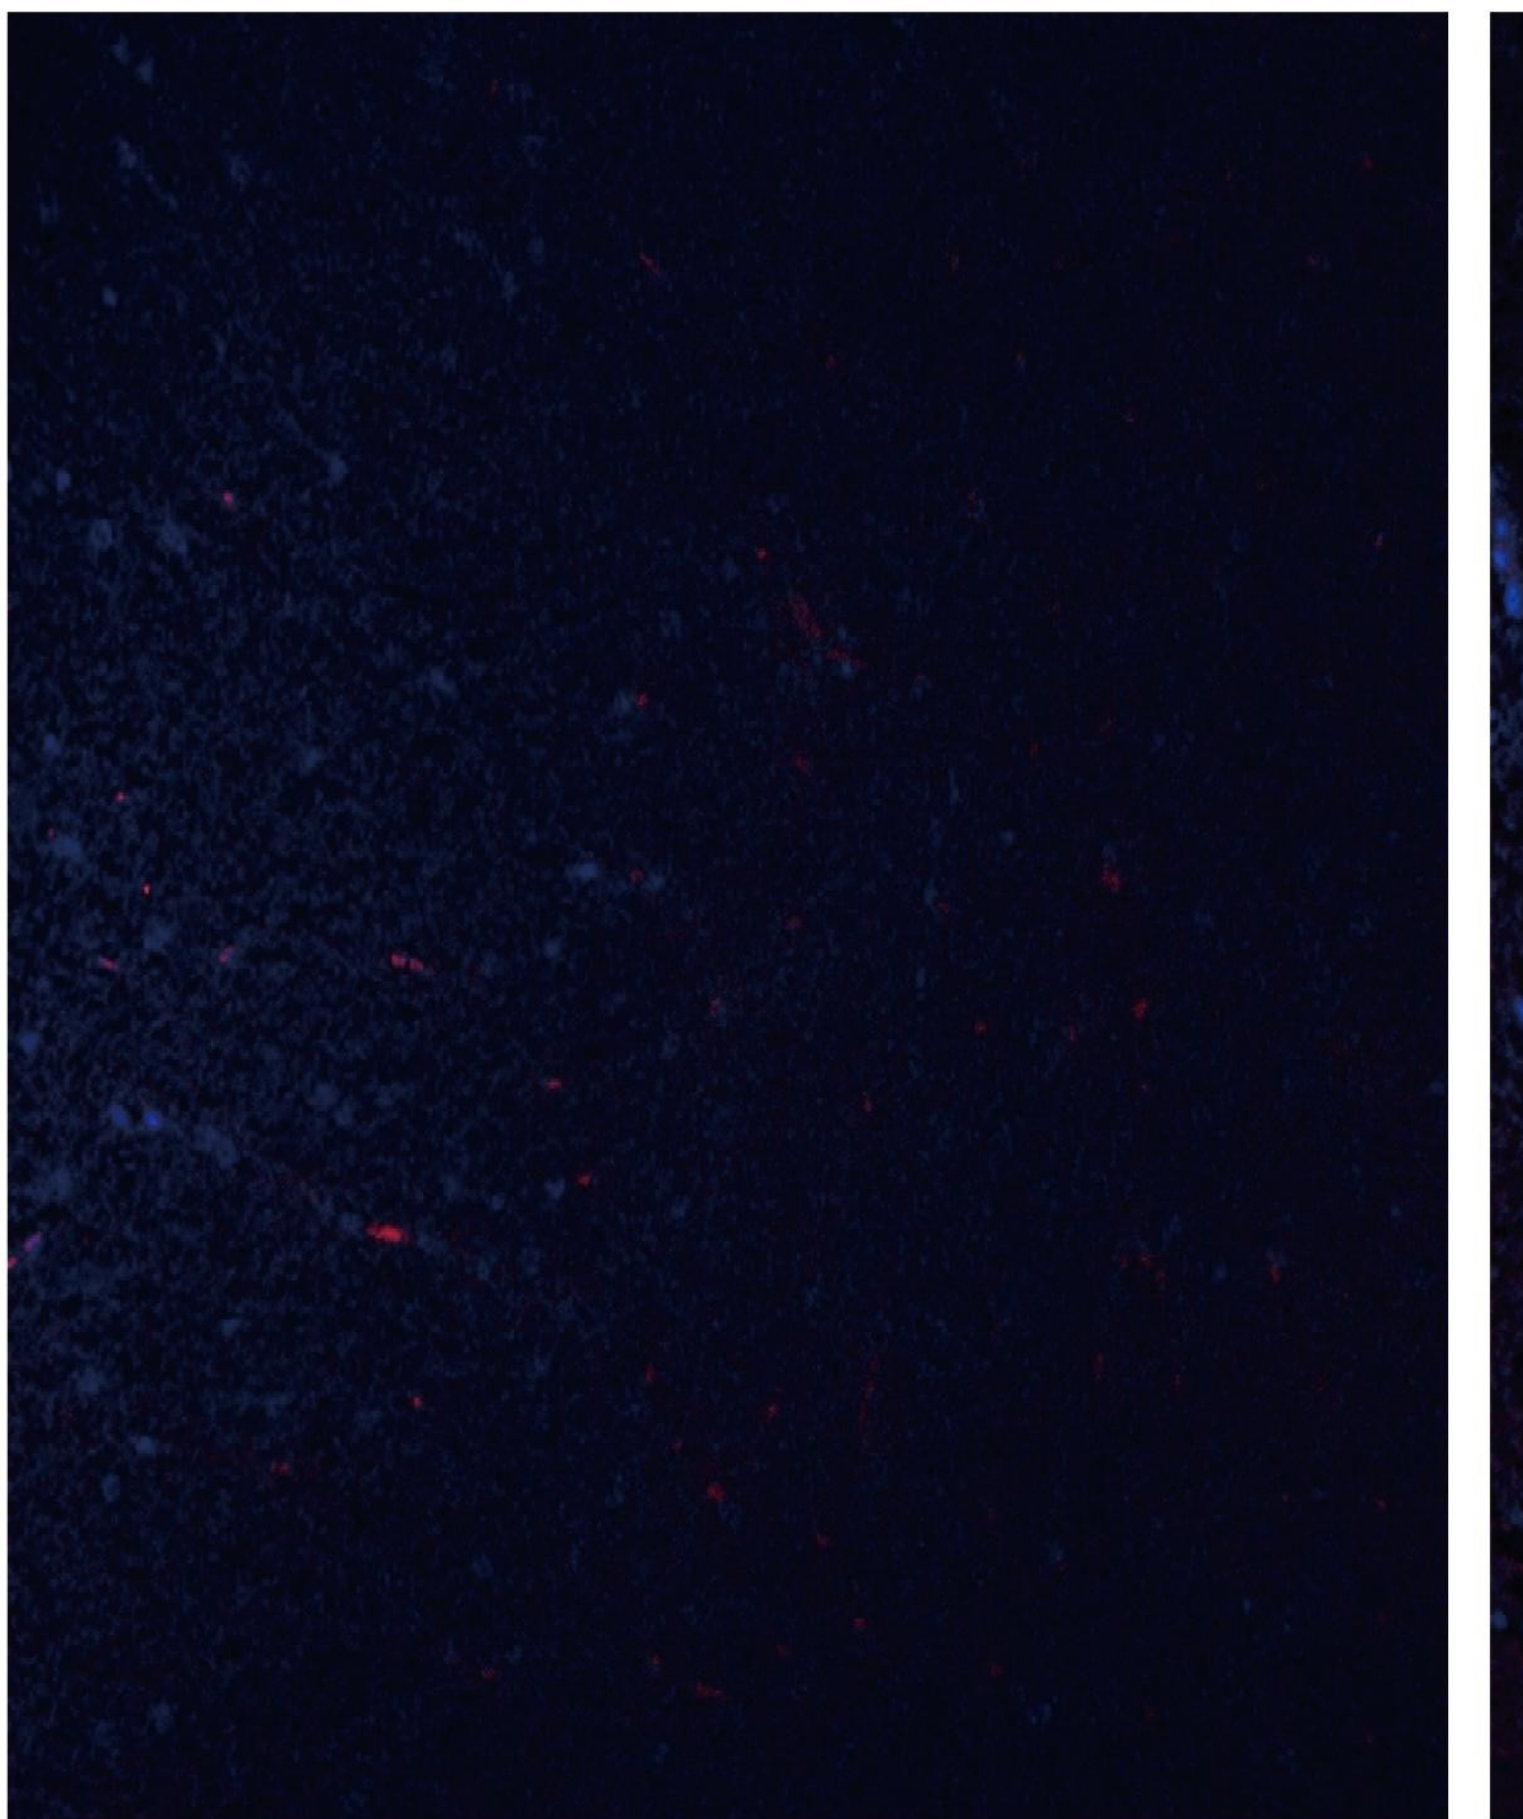

Sham

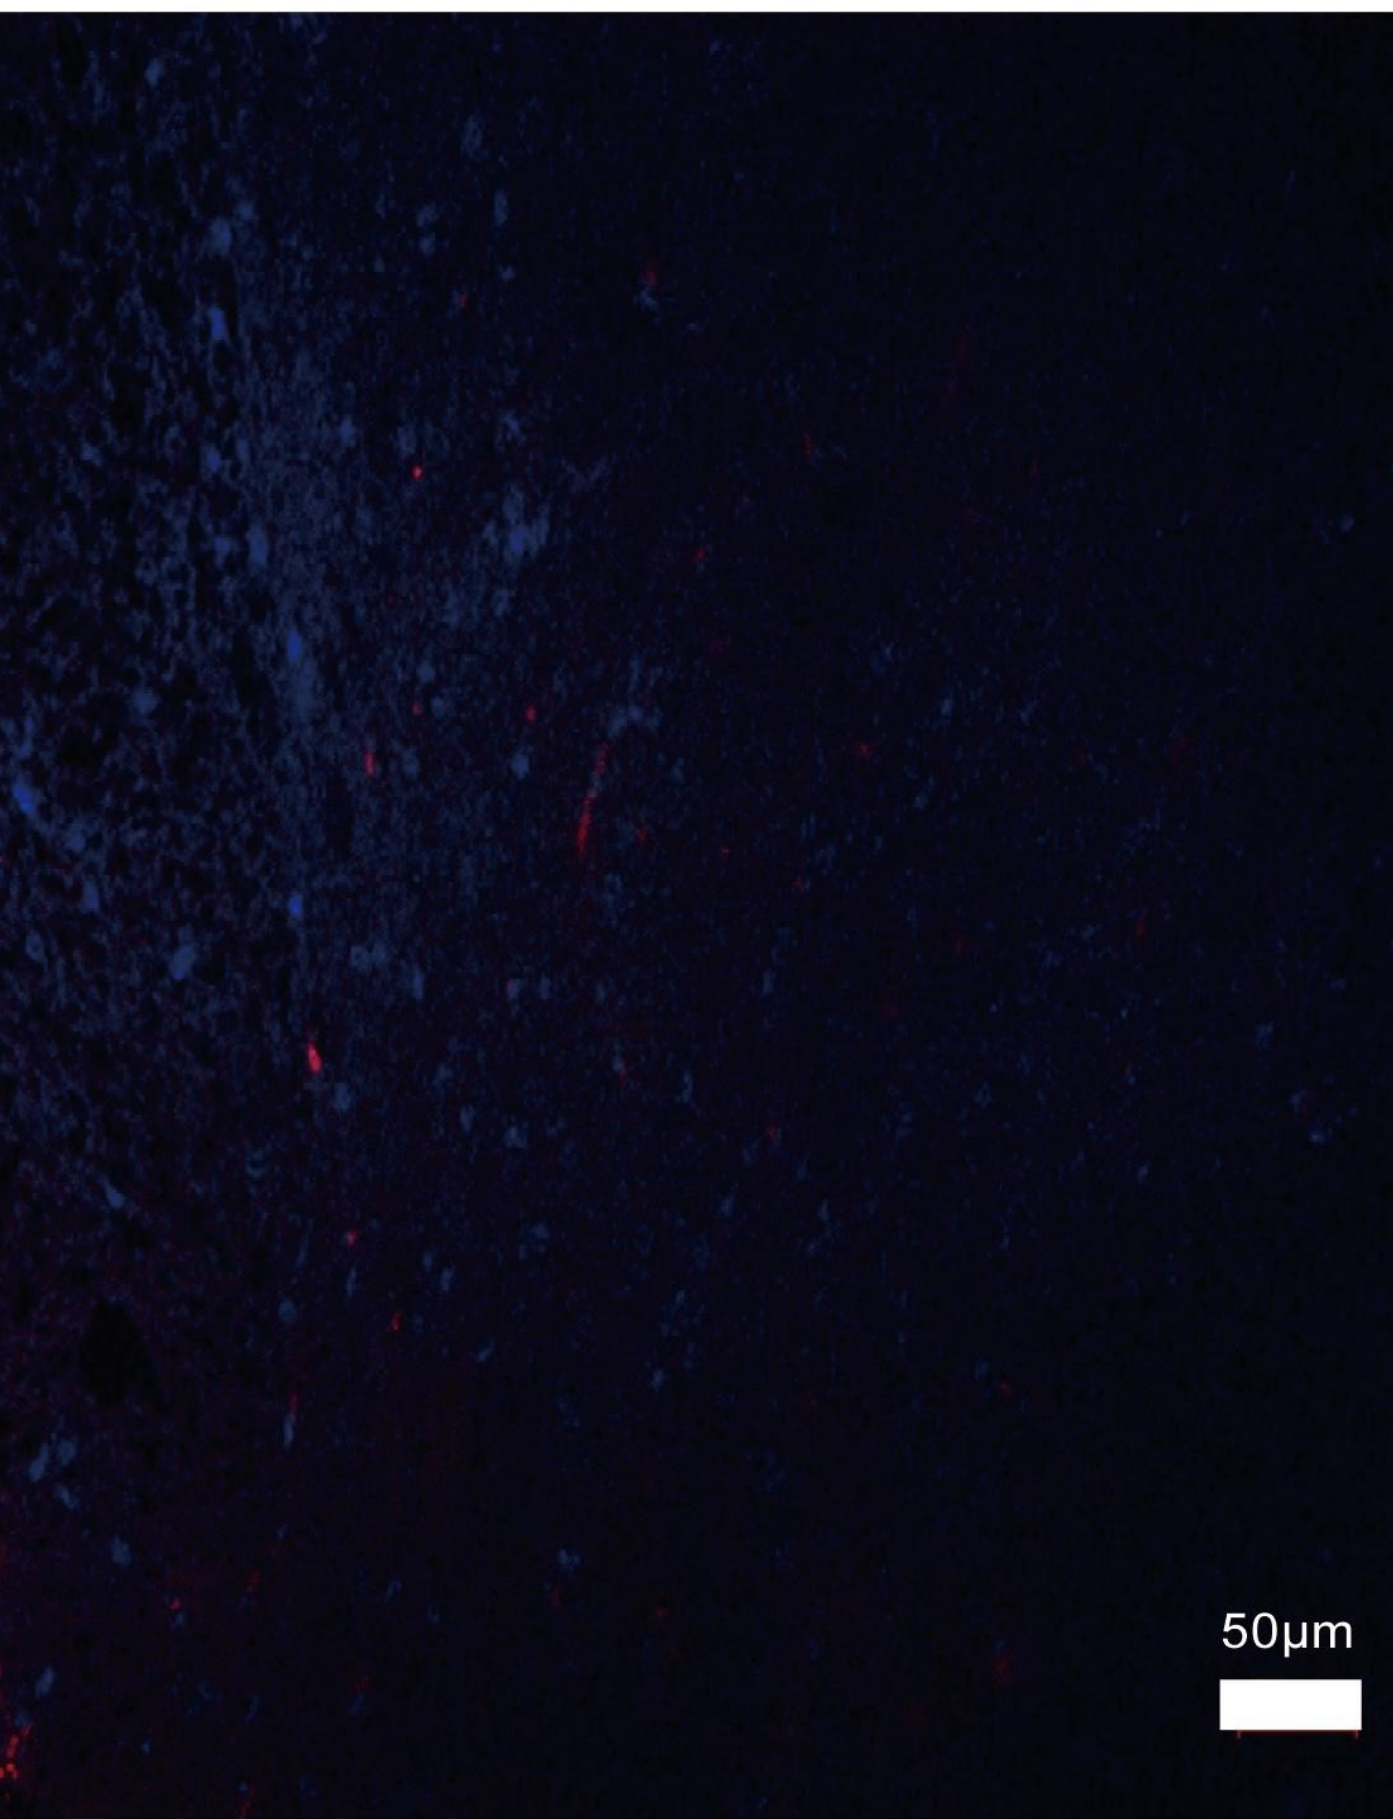

Sham+Microgels

Supplement: d4tb02080d2.pdf [file d4tb02080d2.pdf]

Volcano Plot:  $p\text{-value} < 0.05$  &&  $|\log_2 \text{FC}| > 0$

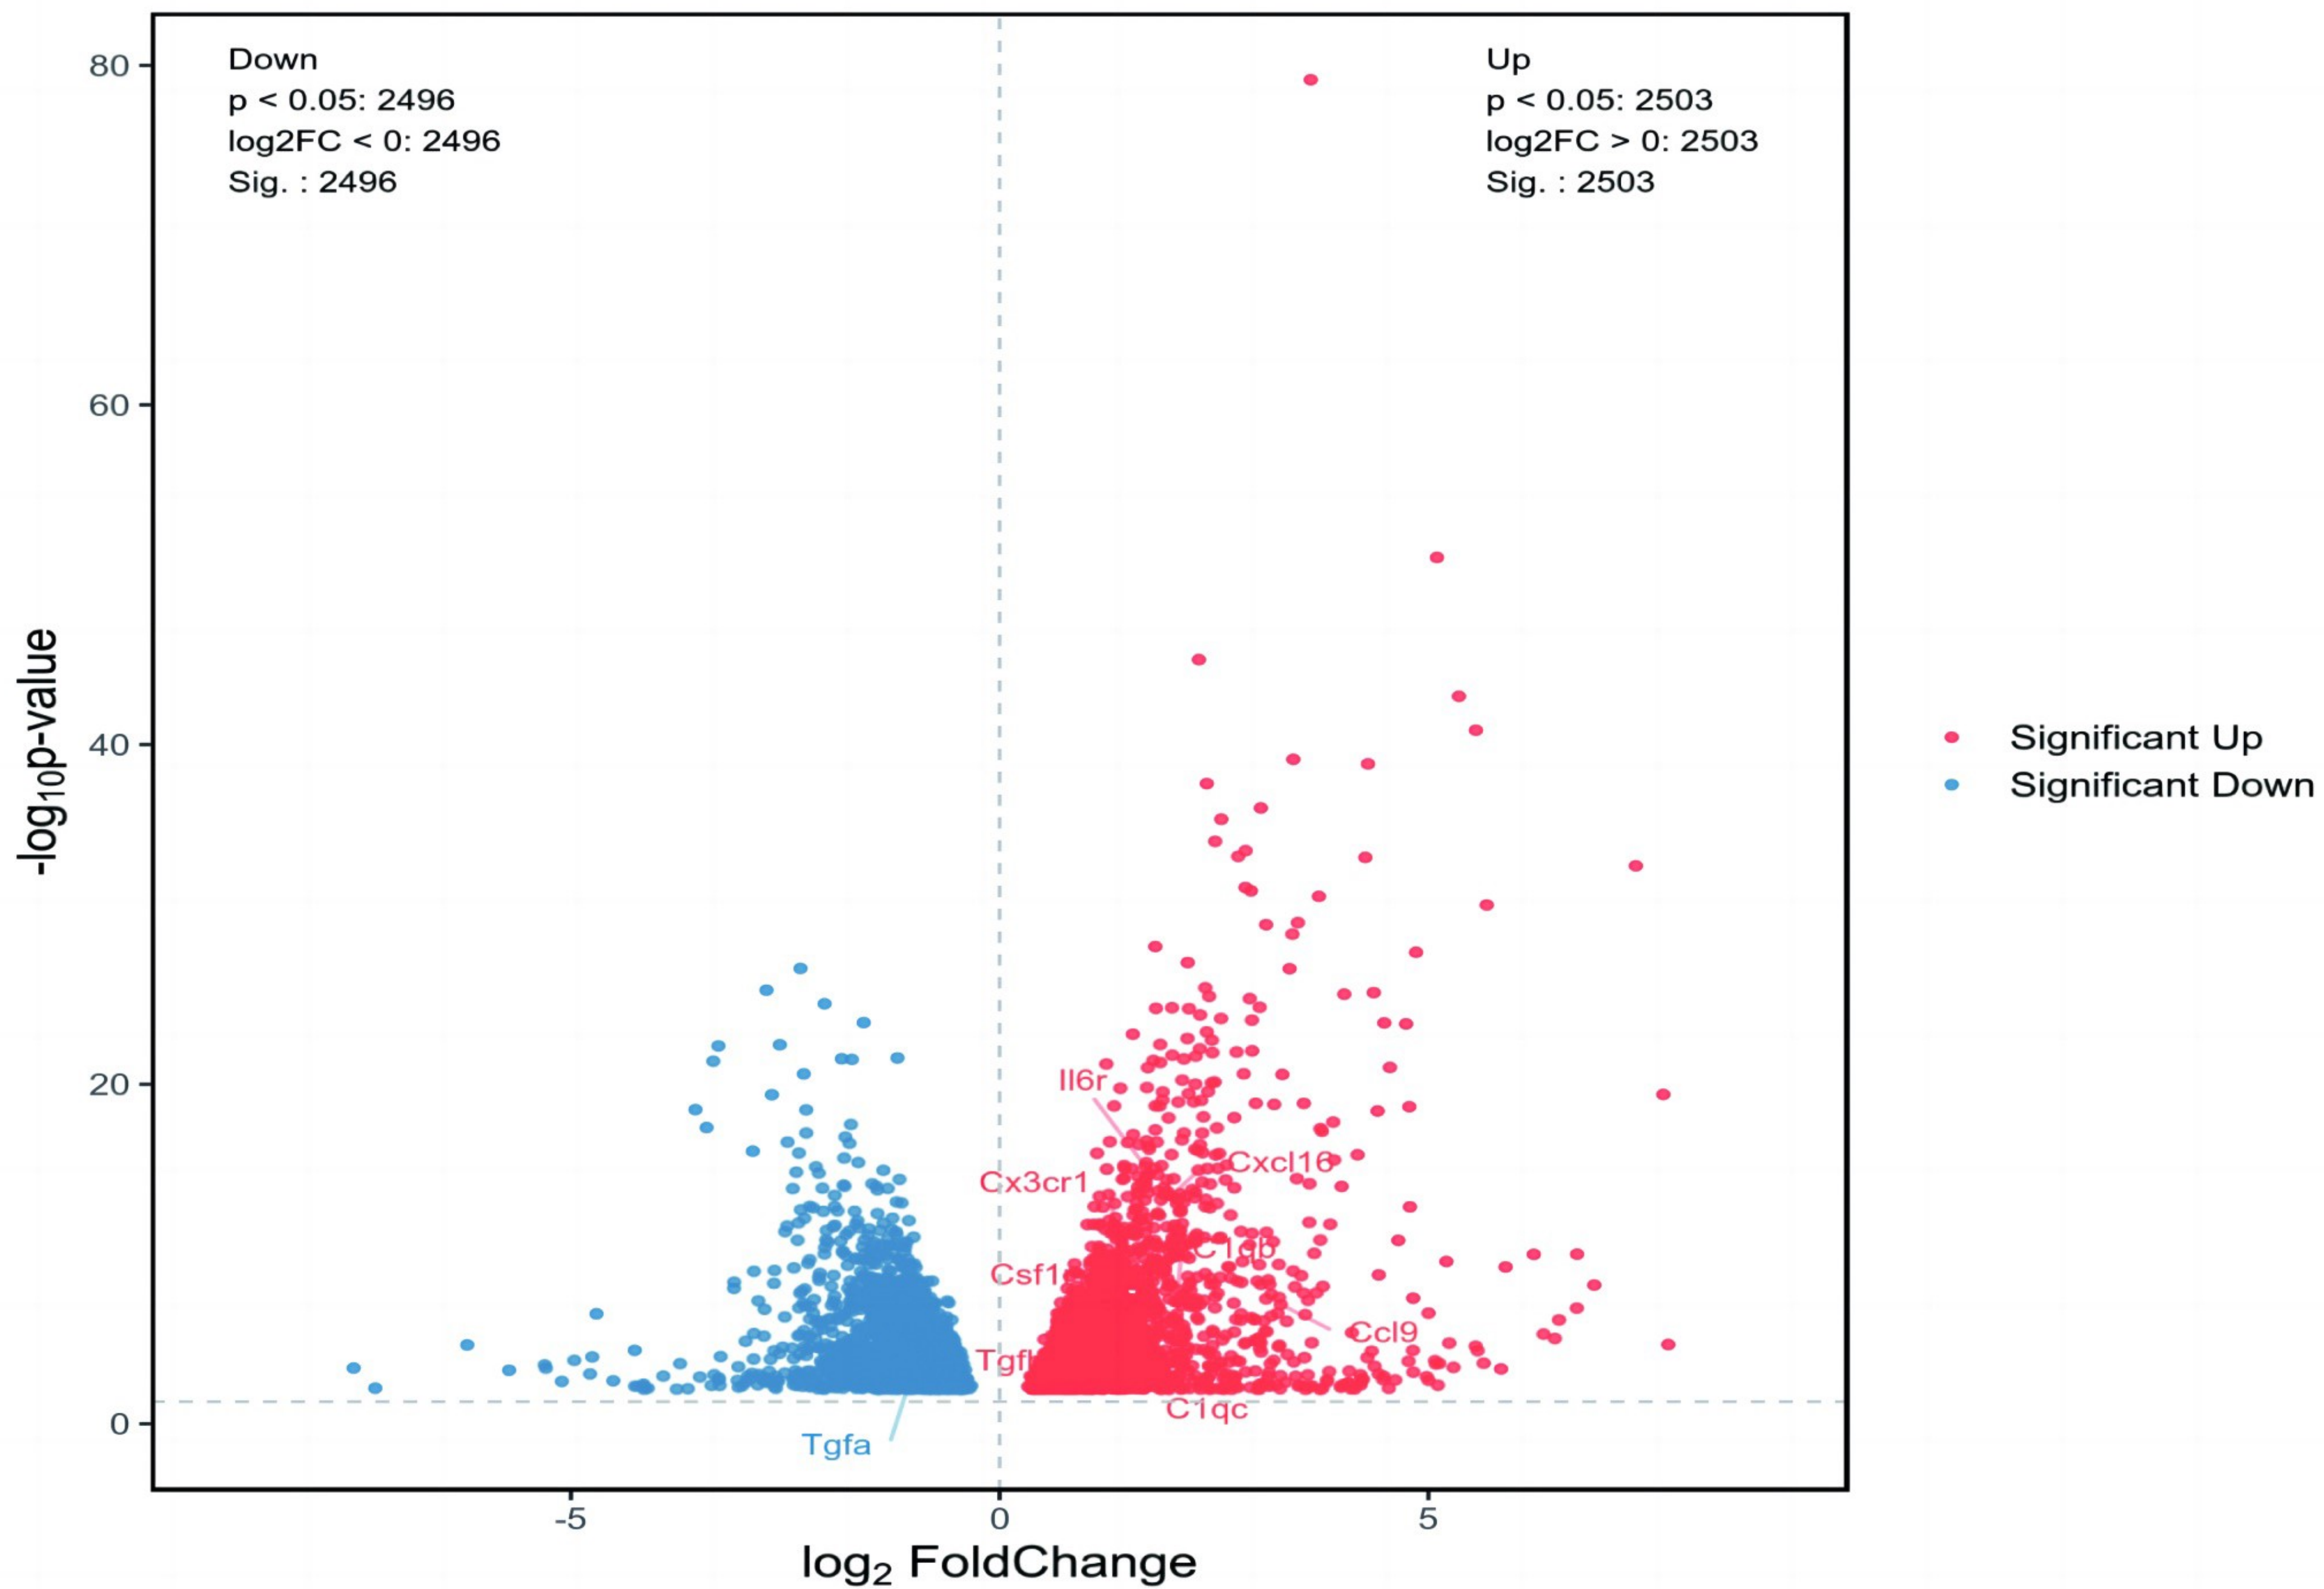

Supplement: d4tb02080d3.pdf [file d4tb02080d3.pdf]
